# Supplementary material for: Simple fluorescence chemosensor for the detection of calcium ions in water samples and its application in bio-imaging of cancer cells
Source: Royal Society of Chemistry journal article supplement (doi:10.1039/d2ra04815a), 2022-01-01
Supplement: d2ra04815a1.pdf [file d2ra04815a1.pdf]

## Supplementary file of

### Simple Fluorescence Chemosensor for the Detection of Calcium Ion in Water Samples and Its Application in Bio-Imaging of Cancer Cells

Maral Salek-Maghsoodi<sup>a</sup>, Zahra Golsanamlou<sup>a</sup>, Sanam Sadeghi-Mohammadi<sup>b</sup>, Masoud Gazizadeh<sup>c</sup>, Jafar Soleymani<sup>a,1</sup>, Reza Safaralizadeh<sup>d</sup>

<sup>a</sup> Pharmaceutical Analysis Research Center, Tabriz University of Medical Sciences, Tabriz, Iran

<sup>b</sup> Tuberculosis and Lung Diseases Research Center, Tabriz University of Medical Sciences, Tabriz, Iran

<sup>c</sup> Liver and Gastrointestinal Research Center, Tabriz University of Medical Sciences, Tabriz, Iran

<sup>d</sup> Department of Biology, Faculty of Natural Sciences, Tabriz University, Tabriz, Iran

---

<sup>1</sup> Corresponding email addresses: [jsoleymanii@gmail.com](mailto:jsoleymanii@gmail.com) and [soleymanij@tbzmed.ac.ir](mailto:soleymanij@tbzmed.ac.ir), Tel: +9841 3337 5365.

## Figures and Table

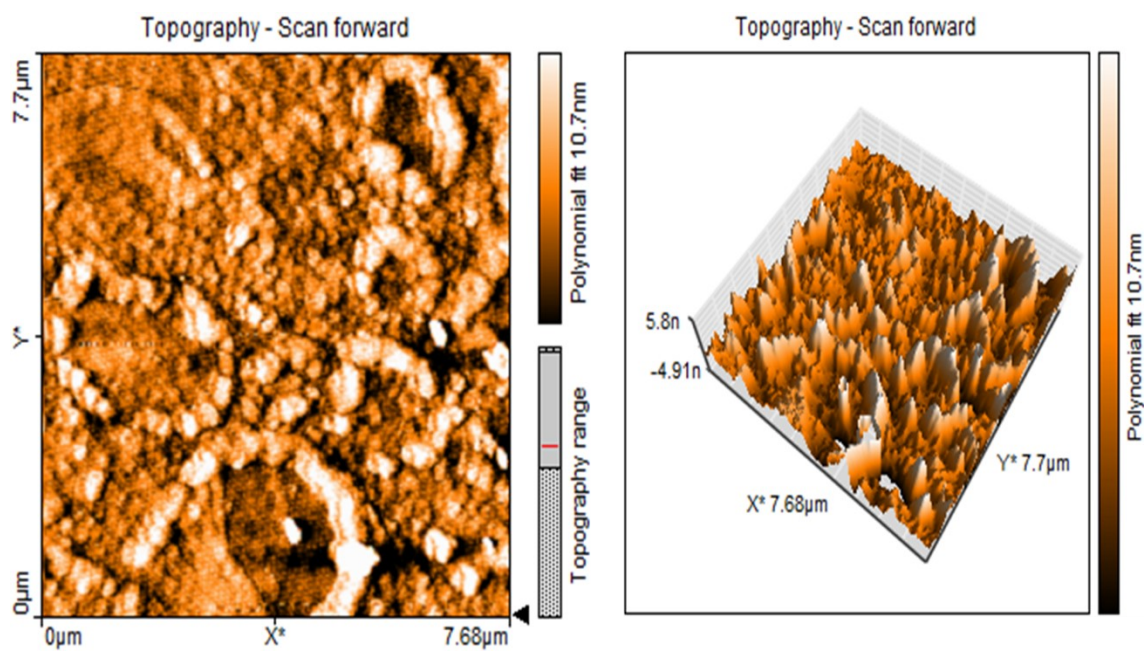

**Fig S1.** AFM images of the MNPs-PDNPs/RhB/FA nanoparticles.

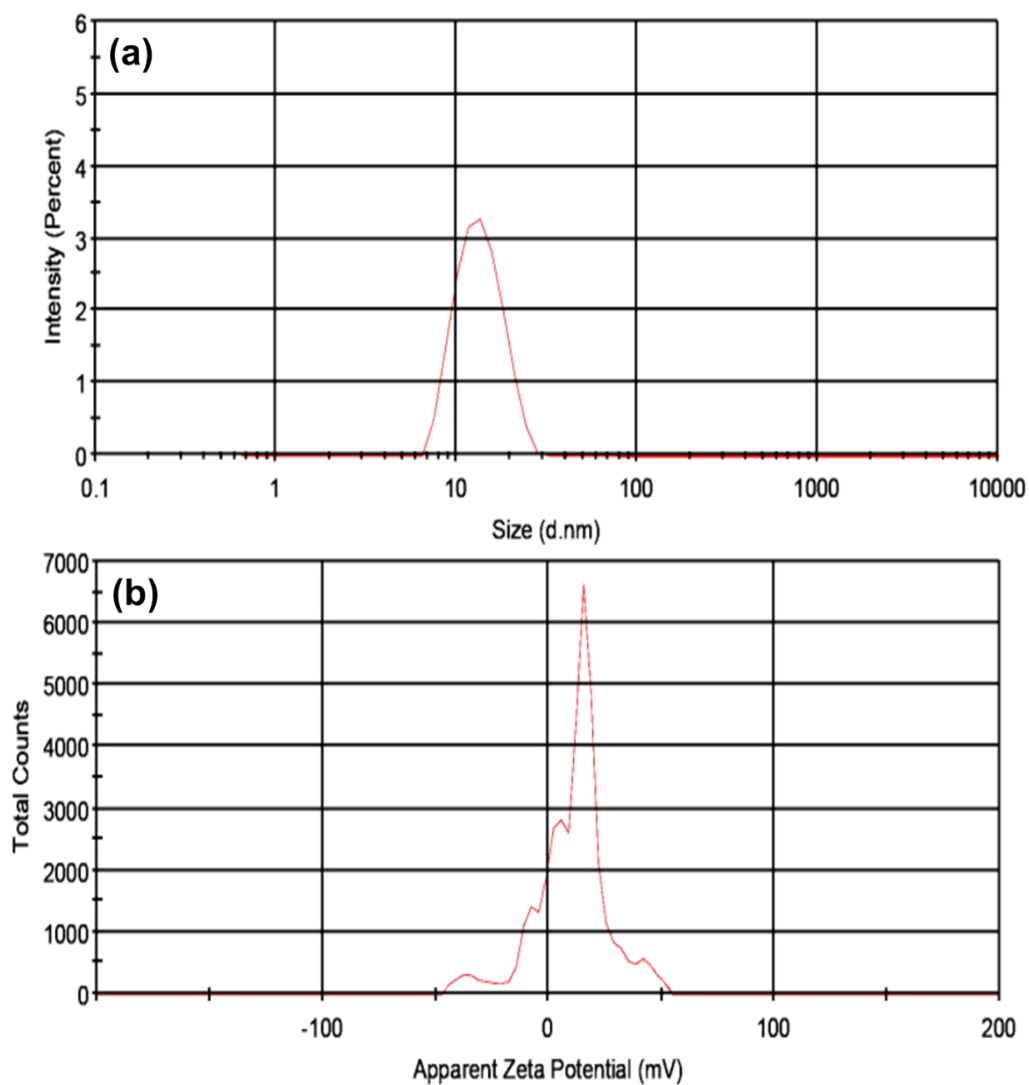

**Fig. S2.** Size (a) and zeta-potential (b) analysis of the MNPs-PDNPs/RhB/FA nanoparticles.

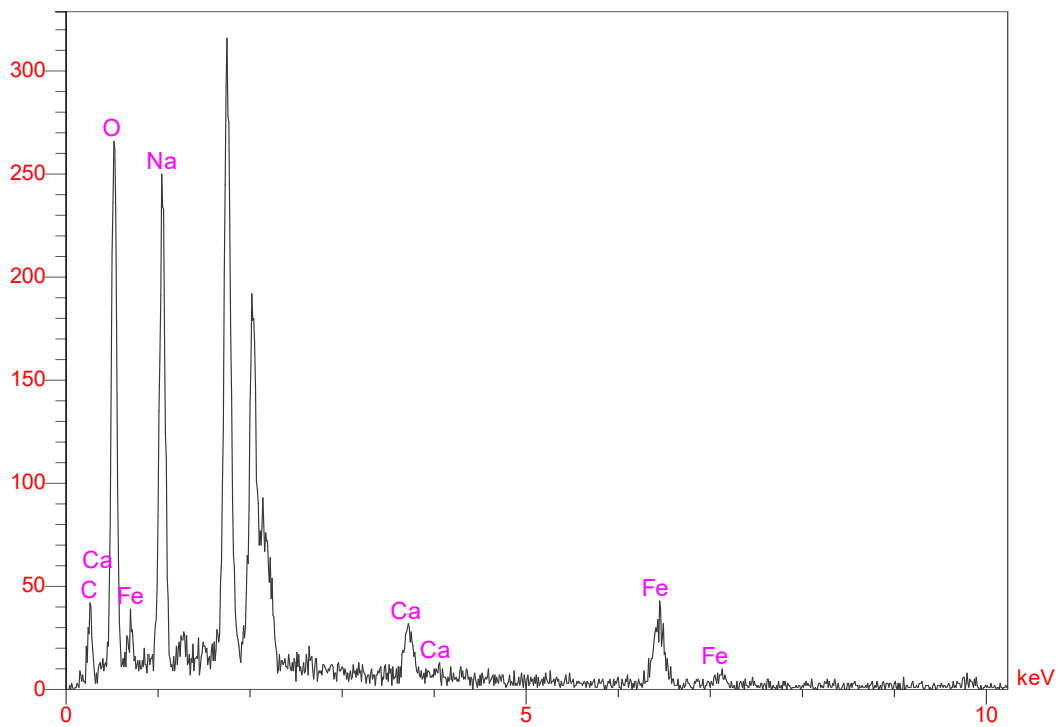

**Fig. S3.** EDX analysis of the MNPs-PDNPs/RhB/FA nanoparticles.

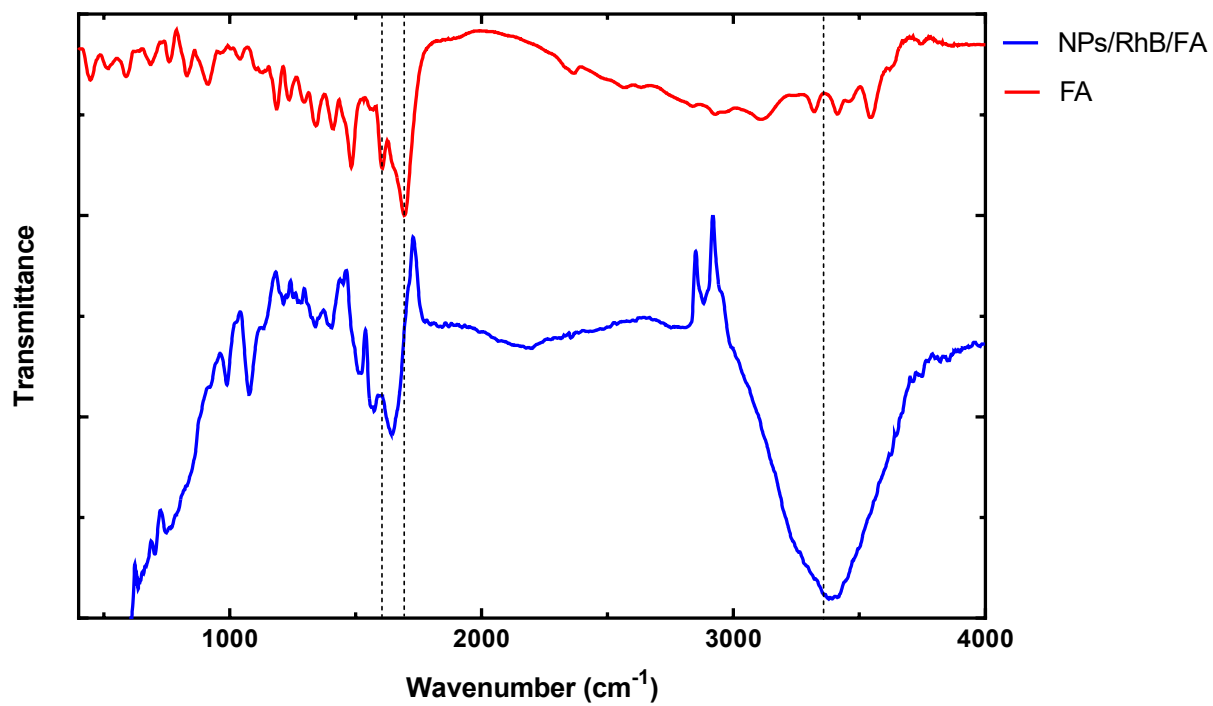

**Fig. S4.** FTIR spectra of MNPs-PDNPs/RhB/FA nanoparticles and FA.

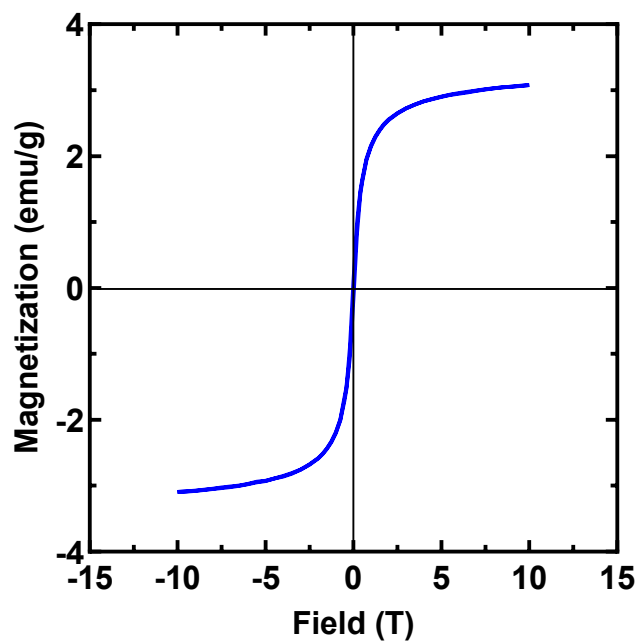

**Fig. S5.** Vibrating sample magnetometer (VSM) analysis of the MNPs-PDNPs/RhB/FA nanoparticles obtained at room temperature.

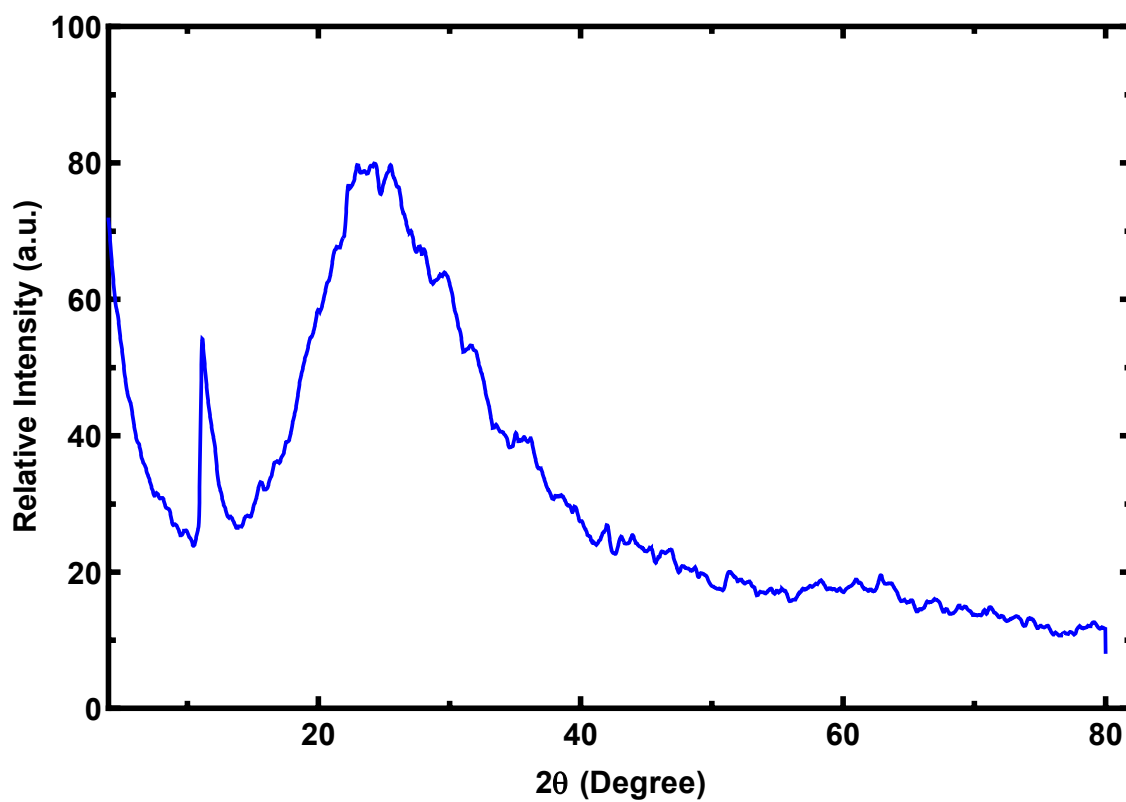

**Fig. S6.** XRD analysis of the MNPs-PDNPs/RhB/FA nanoparticles at the 2-theta range of 4-80°.

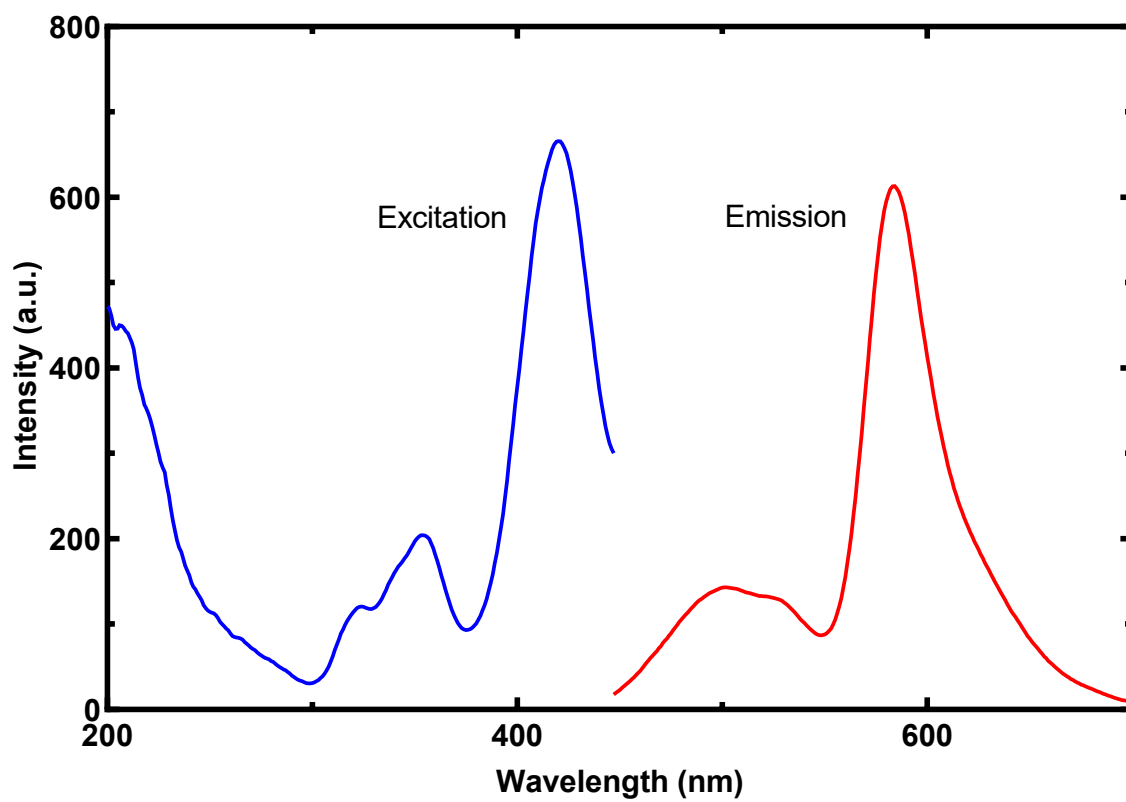

**Fig. S7.** Excitation and emission of the MNPs-PDNPs/RhB/FA nanoparticles.



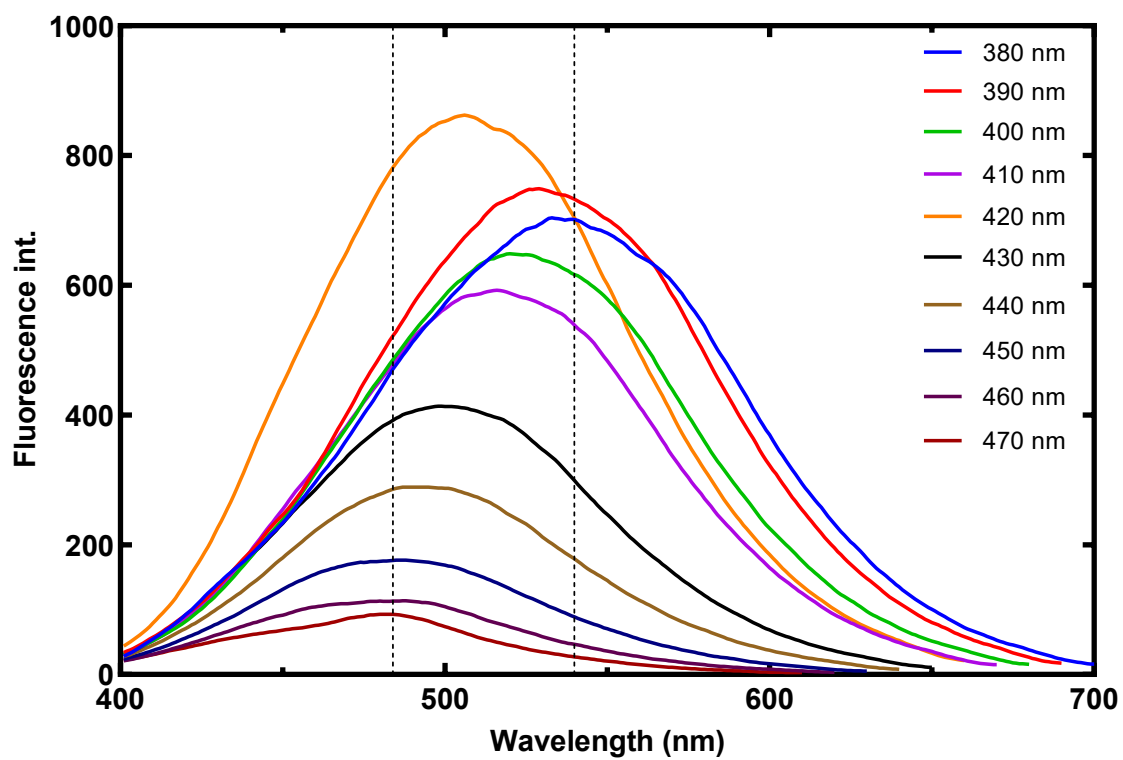

**Fig. S8.** Effect of various excitation wavelengths on the fluorescence spectra and the peak position of the MNPs-PDNPs/RhB/FA nanoparticles.

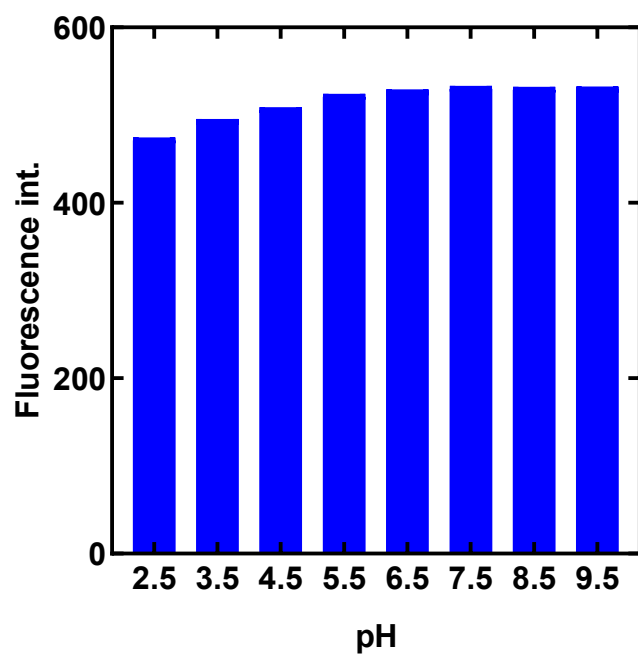

**Fig. S9.** pH effect on the fluorescence emission of the MNPs-PDNPs/RhB/FA nanoparticles.

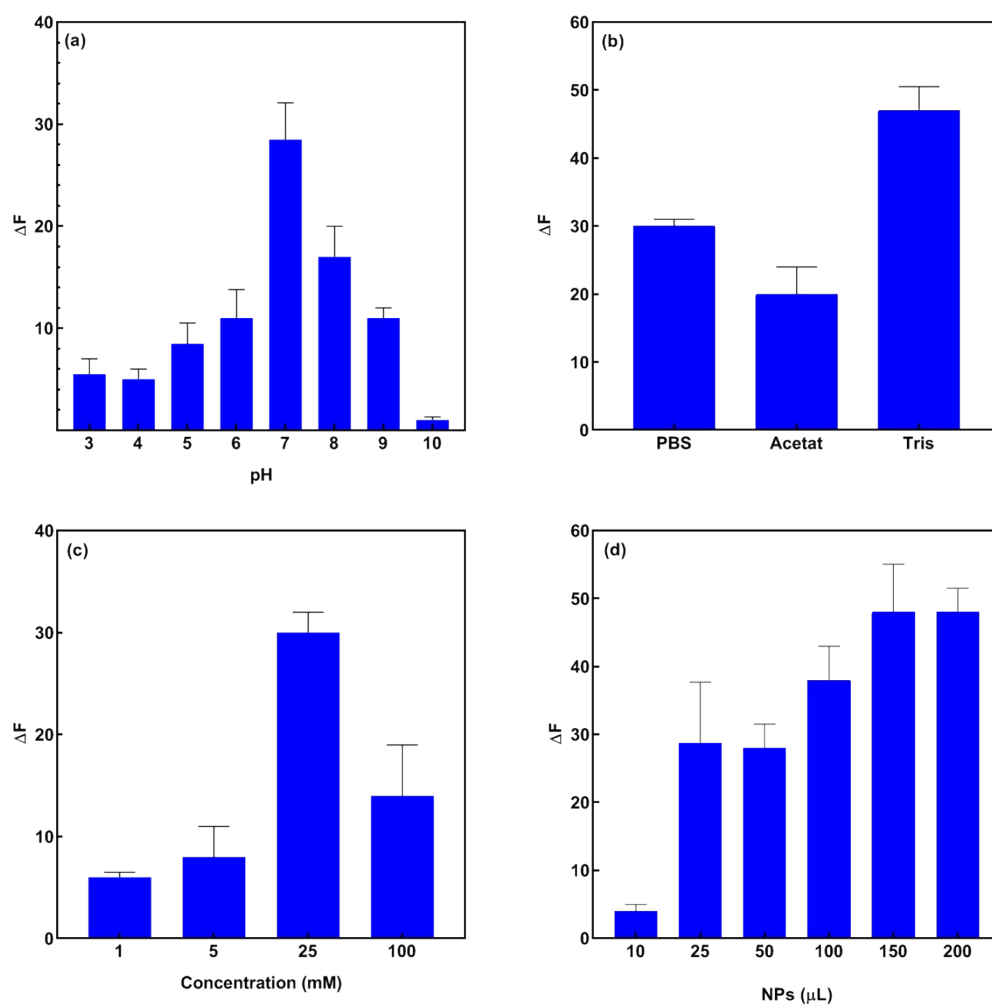

**Fig. S10.** Optimization of effects of (a) pH, (b) Buffer type, (c) buffer concentration, (d) and concentration of MNPs-PDNPs/RhB/FA.

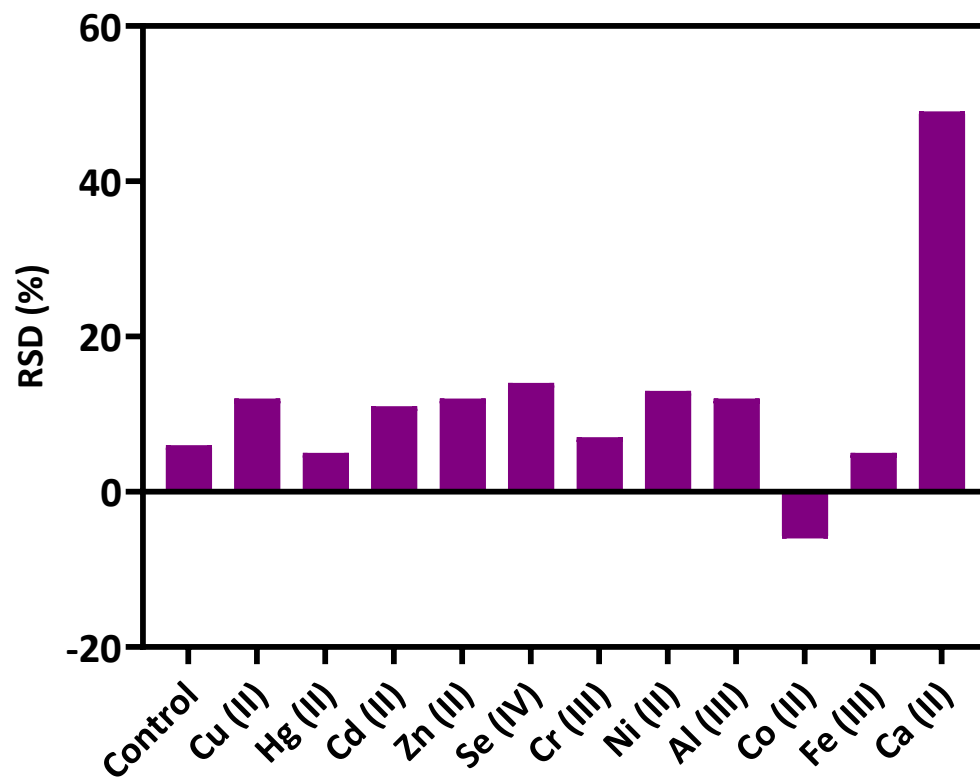

**Fig. S11.** Effect of interfering agents ( $\text{Al}^{3+}$ ,  $\text{Hg}^{2+}$ ,  $\text{Cd}^{2+}$ ,  $\text{Zn}^{2+}$ ,  $\text{Se}^{4+}$ ,  $\text{Cr}^{2+}$ ,  $\text{Ni}^{2+}$ ,  $\text{Fe}^{3+}$ ,  $\text{Cu}^{2+}$ , and  $\text{Co}^{2+}$ ) on the probe response in the presence of Ca ions.

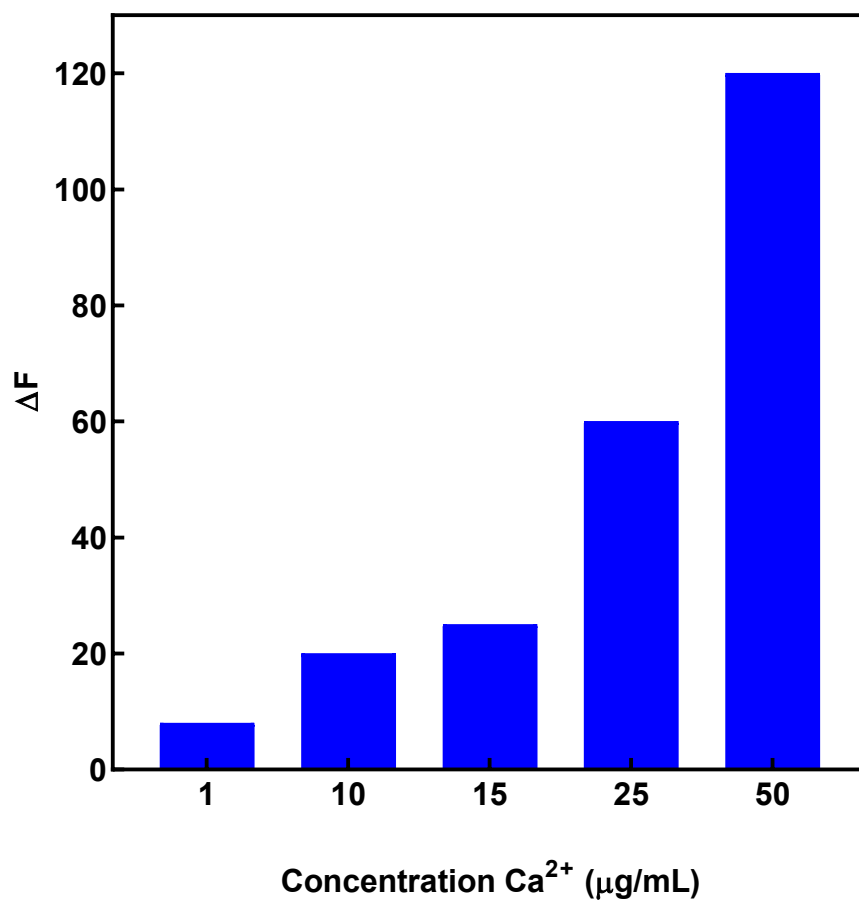

**Fig. S12.** Quantitative detection of Ca in live cells.

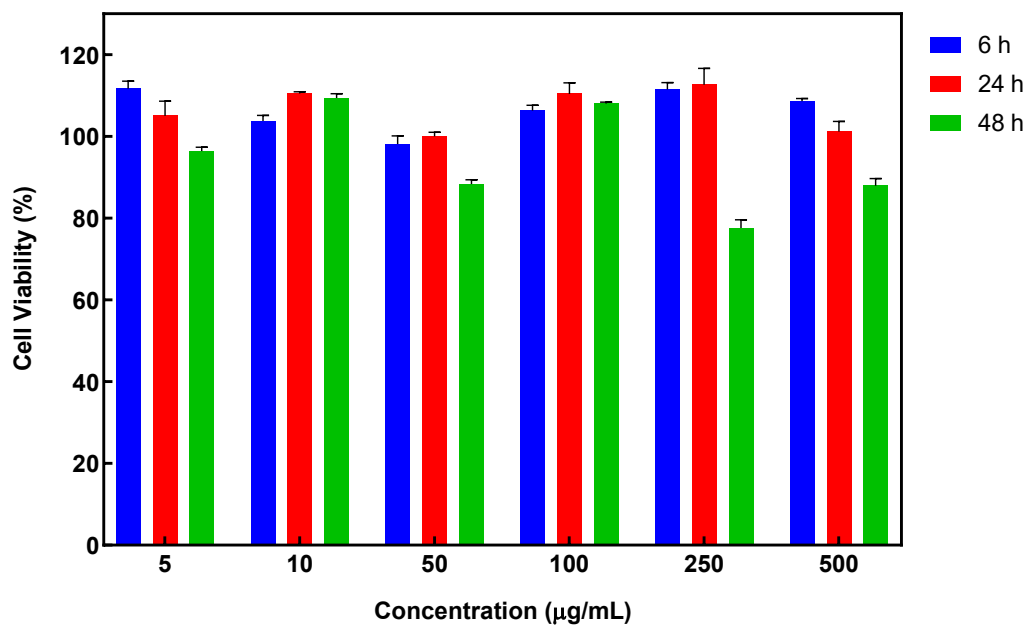

**Fig. S13.** Cell viability of MNPs-PDNPs/RhB/FA nanoparticles on the MCF 7 cell lines.

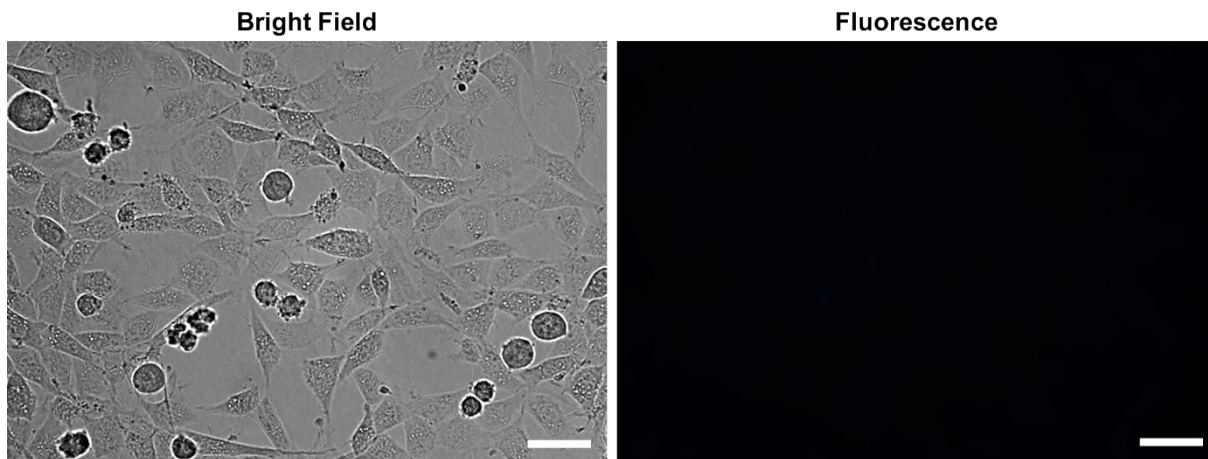

**Fig. S14.** Uptake of the MNPs-PDNPs/RhB/FA nanoparticles (200  $\mu\text{g}/\text{mL}$ ) to the FR-negative HEK 293 normal cells (scale bar 20  $\mu\text{m}$ ).

**Table S1.** EDS profile of MNPs-PDNPs/RhB/FA nanoparticles.

| Element | W%*    | A%**   |
|---------|--------|--------|
| C       | 20.21  | 28.64  |
| O       | 25.19  | 30.61  |
| Na      | 31.75  | 33.78  |
| Ca      | 22.85  | 6.97   |
| Fe      | 20.21  | 28.64  |
| Total   | 100.00 | 100.00 |

\* weight and \*\* atomic percentages



Table S2. Analytical performances of fluorescence strategies for calcium determination

| <b>Approach</b>                                         | <b>Sample</b>   | <b>LOD*</b> | <b>Linear range</b>         | <b>Reference</b> |
|---------------------------------------------------------|-----------------|-------------|-----------------------------|------------------|
| EGTA-modified CDs                                       | Water           | 380 nM      | 15–300 $\mu$ M              | [29]             |
| Ag/Au nanocluster/carbon dots nanohybrids               | tap and mineral | 5 nM        | 20 – 600 nM                 | [30]             |
| EDTA-CDs                                                | Serum           | 77 pM       | 1-10 nM                     | [31]             |
| Silver nanocluster–nanoparticle complexes (AgNCs–AgNPs) | Serum           | -           | 0.20-1.19 mM                | [32]             |
| Oxytetracycline                                         | water           | 125 nM      | 0–3 $\mu$ M                 | [33]             |
| QDs-aptamer                                             | water           | 3.77 pM     | -                           | [34]             |
| CuNCs                                                   | cell            | 220 nM      | 2–350 $\mu$ M               | [35]             |
| MNP-PDNP/RhB/FA                                         | Live cell       | -           | 0.5 – 2.5 $\mu$ M           | This work        |
|                                                         | water samples   | -           | 12.5 $\mu$ M to 500 $\mu$ M |                  |

\*Limit of detection
